# Supplementary material
Source: PubMed Central journal article supplement (PMC4691284)
Supplement: NIHMS741304-supplement-3.pdf [file NIHMS741304-supplement-3.pdf]

## Inventory of Supplementary Materials

Figure S1, related to Figure 3. Cdc15 and 6 human F-BARs do not tubulate membranes under a variety of conditions.

Figure S2, related to Figure 3. A significant fraction of human F-BAR domains do not tubulate membranes in vivo.

Figure S3, related to Figure 3. Cdc15 and other F-BAR domains are folded and functional.

Figure S4, related to Figure 4. Non-tubulating human F-BAR domains show evidence for oligomerization in solution.

Figure S5, related to Figure 5. F-BAR domain oligomerization and membrane binding.

Figure S6, related to Figure 6. Oligomerization is critical for Cdc15 function in cytokinesis.

Figure S7, related to Figure 6. Cdc15 oligomerization mutant genetic interactions.

Table S1, related to Figure 3. Membrane tubulation by human F-BAR domains.

Movie S1, related to Figure 6. Time-lapse of *cdc15(E30K E152K)-mCherry sid4-GFP* cells failing cytokinesis.

Movie S2, related to Figure 6. Time-lapse of *cdc15(K163E)-mCherry sid4-GFP* cells failing cytokinesis.

Supplementary Experimental Procedures

Supplementary References

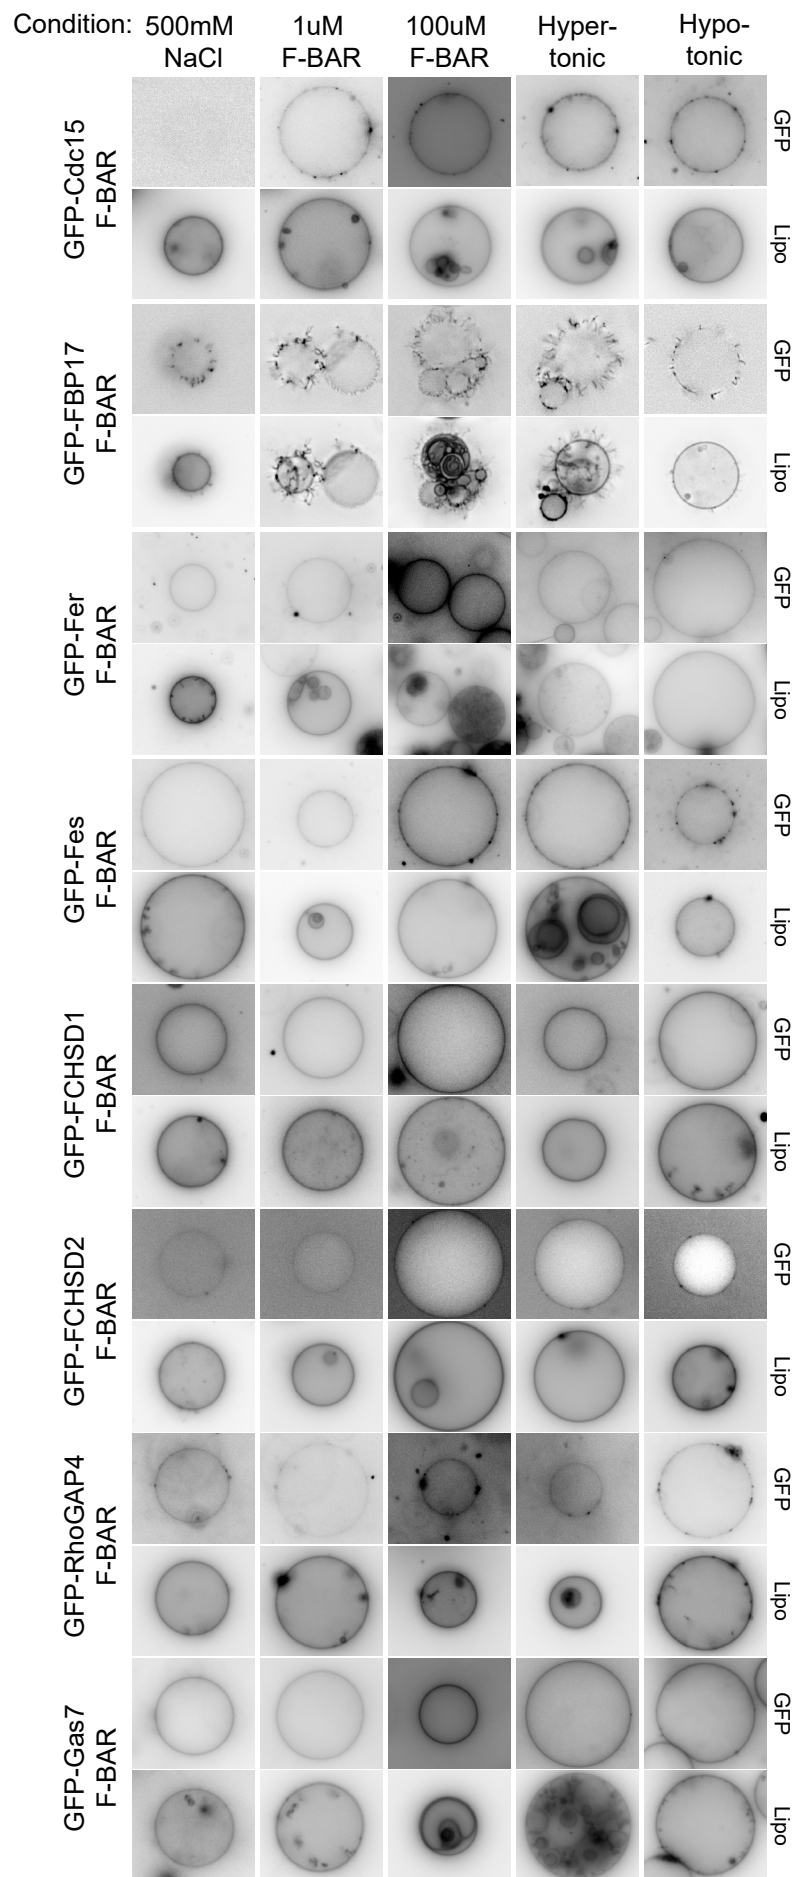

McDonald et al. Figure S1

**Figure S1, related to Figure 3. Cdc15 and 6 human F-BARs do not tubulate membranes under a variety of conditions.** The indicated F-BAR domains were mixed with GUVs (composed of 69% DOPC / 15% DOPE / 10% DOPS / 5% PI(4)P / 1% Rhodamine-PE) in the indicated buffer condition. Concentrations of F-BARs were 10  $\mu$ M and NaCl 150 mM unless otherwise indicated. Scale bar = 10  $\mu$ m.

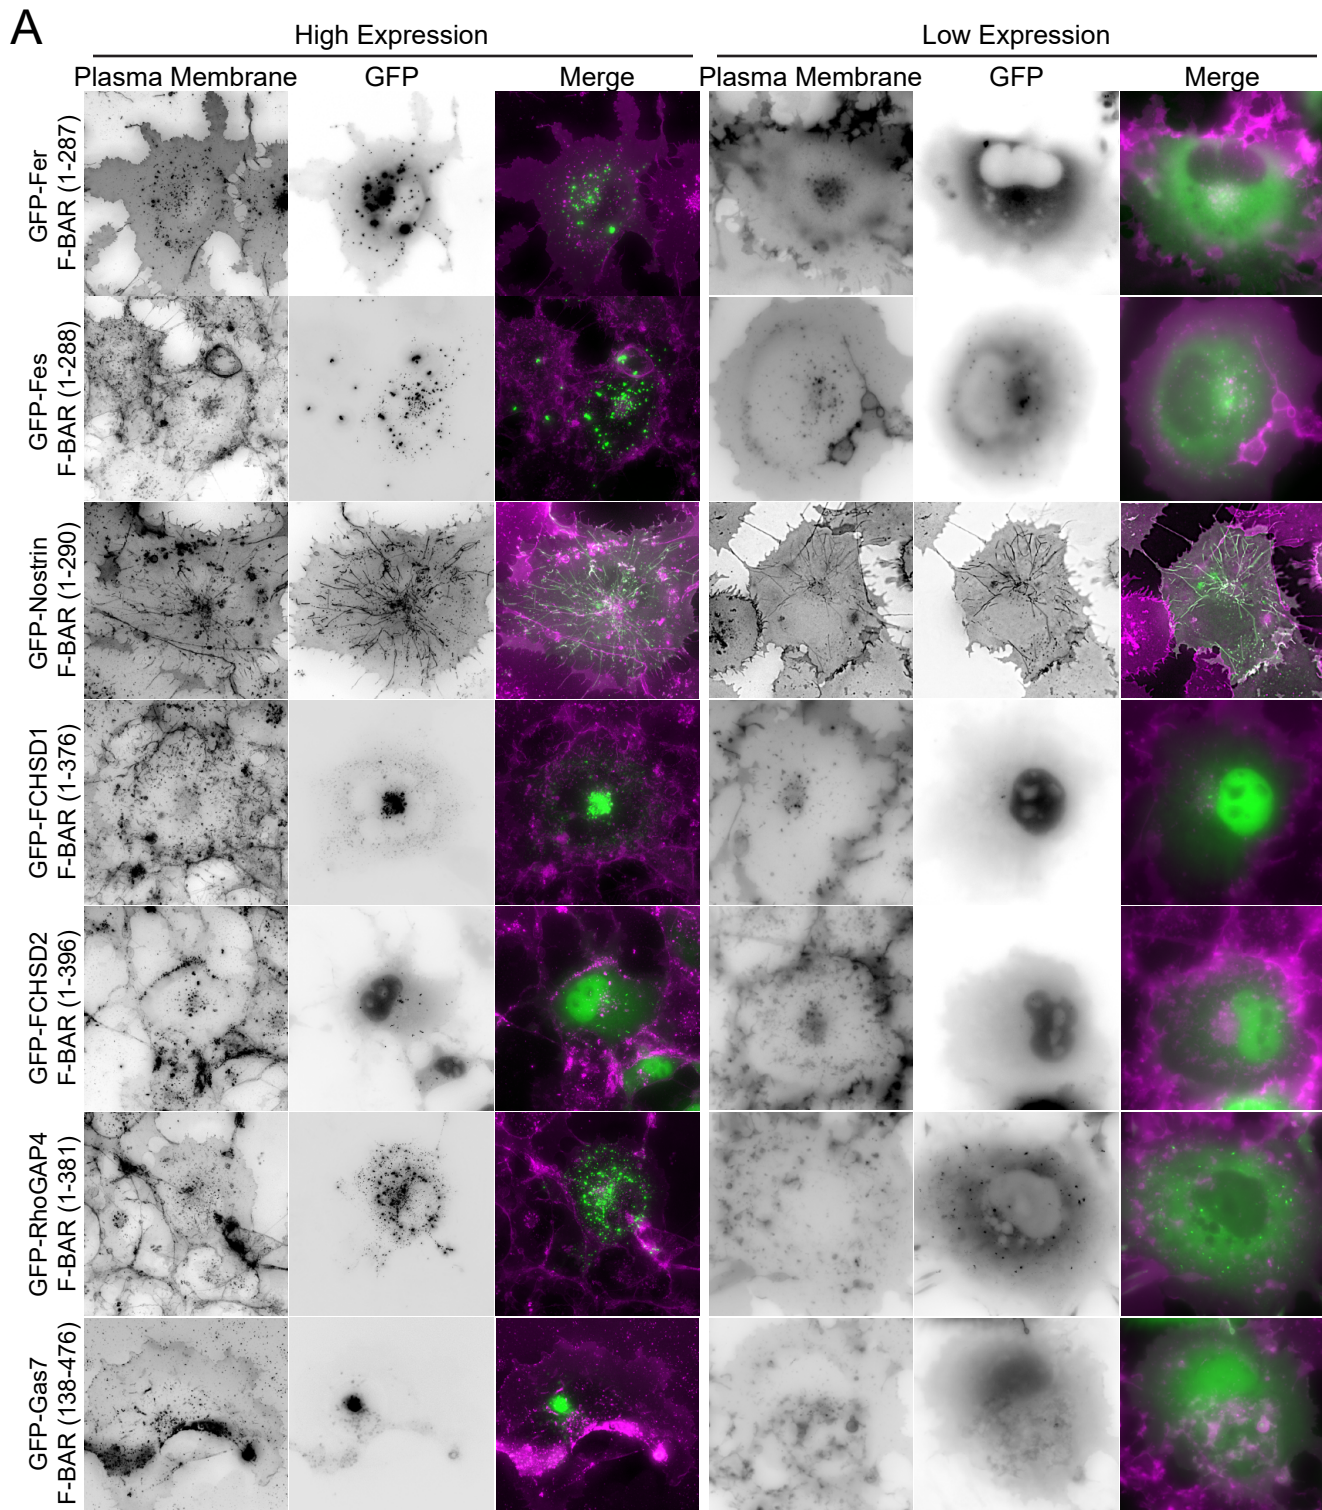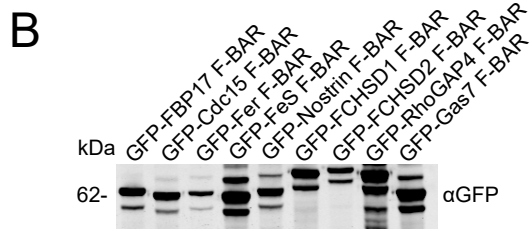



**Figure S2, related to Figure 3. A significant fraction of human F-BAR domains do not tubulate membranes in vivo.** A) Expression of the indicated GFP-F-BAR domains in COS-7 mammalian cells, co-stained with CellMask Orange plasma membrane stain. High and low expression example cells for each condition are shown. Scale bar = 10  $\mu\text{m}$ . B) Anti-GFP immunoblot showing expression of GFP-F-BAR domain constructs in COS-7 cell lysates.

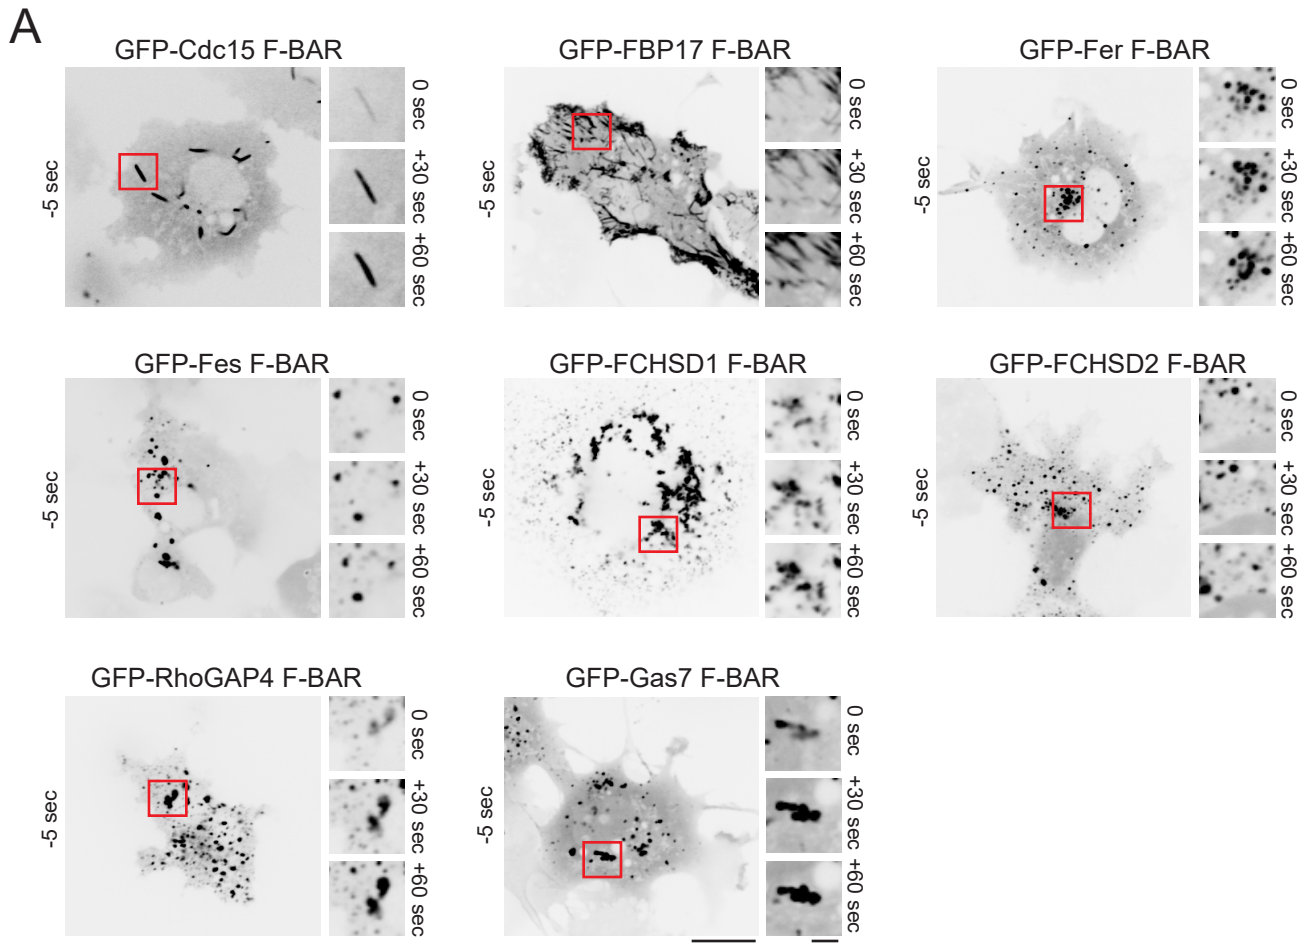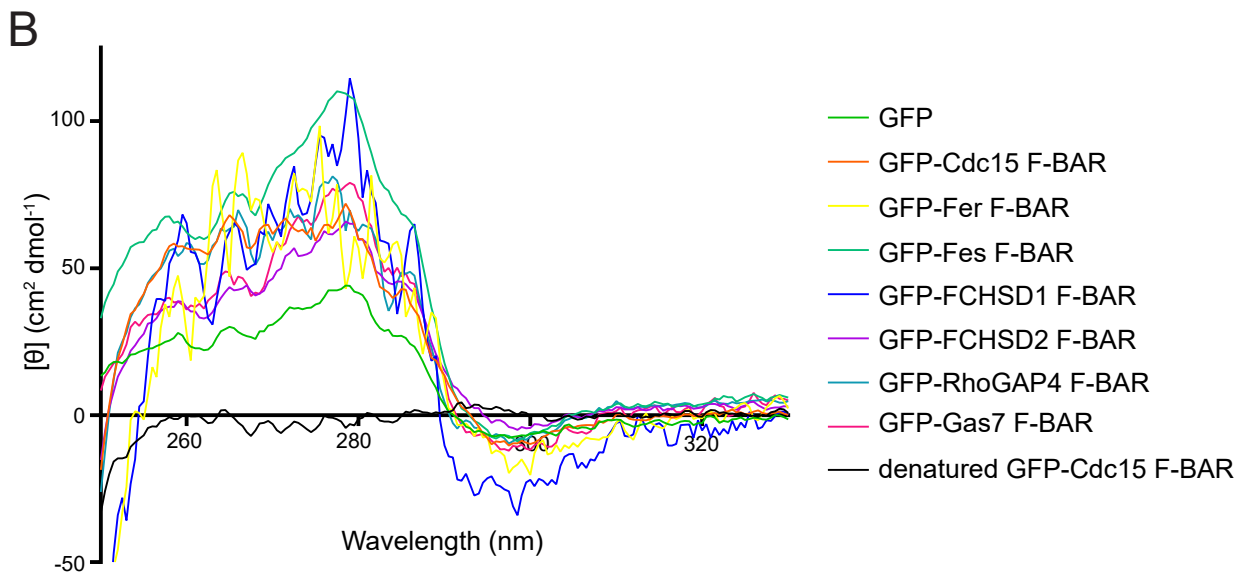

**Figure S3, related to Figure 3. Cdc15 and other F-BAR domains are folded and functional.**

A) FRAP assay of the indicated transfected construct in COS-7 cells. The area in each red square was bleached. Scale bars = 10  $\mu\text{m}$  (main image) and 2  $\mu\text{m}$  (inset). B) Near-UV circular dichroism spectra of GFP and each GFP-F-BAR domain.

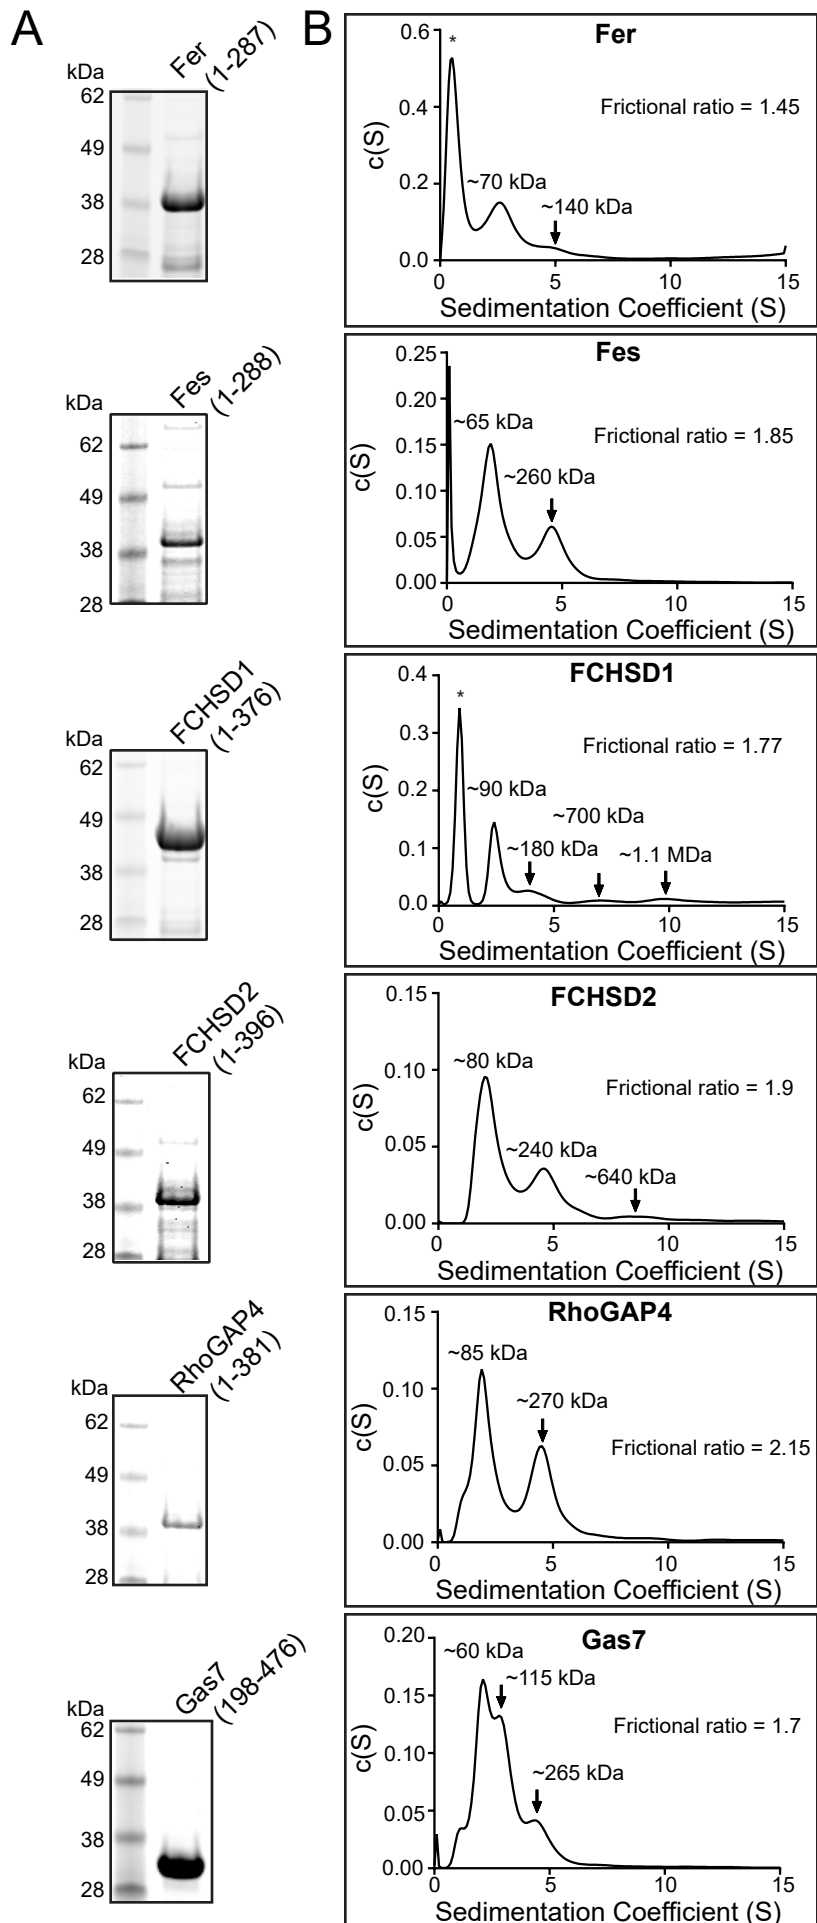



**Figure S4, related to Figure 4. Non-tubulating human F-BAR domains show evidence for oligomerization in solution.** A) Coomassie stained SDS-PAGE of the indicated purified F-BARs. B) Analytical ultracentrifugation traces of the indicated human F-BAR domains. Arrows indicate oligomerized species. \* indicates small MW contaminates.

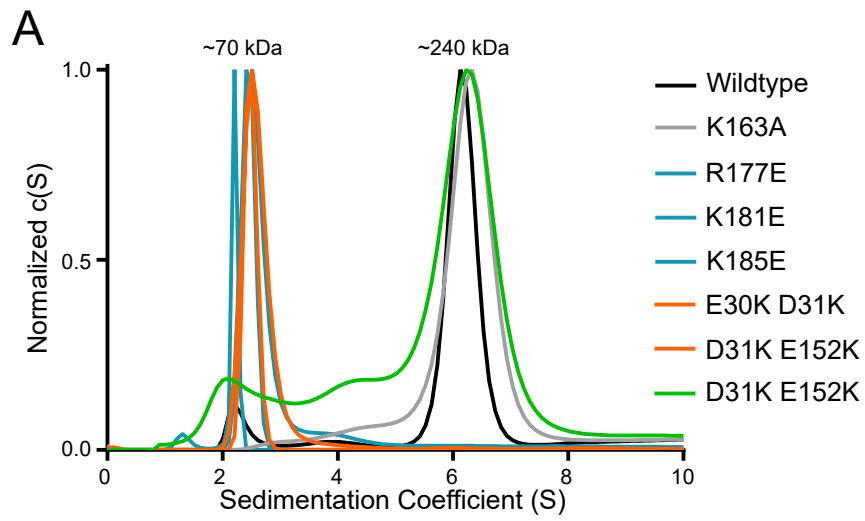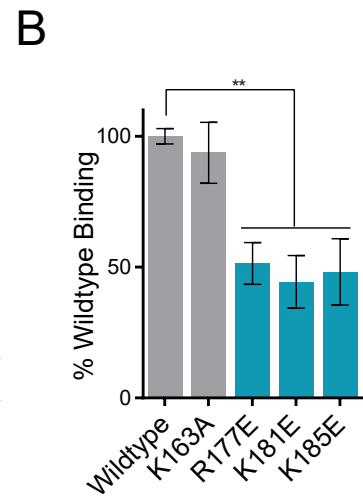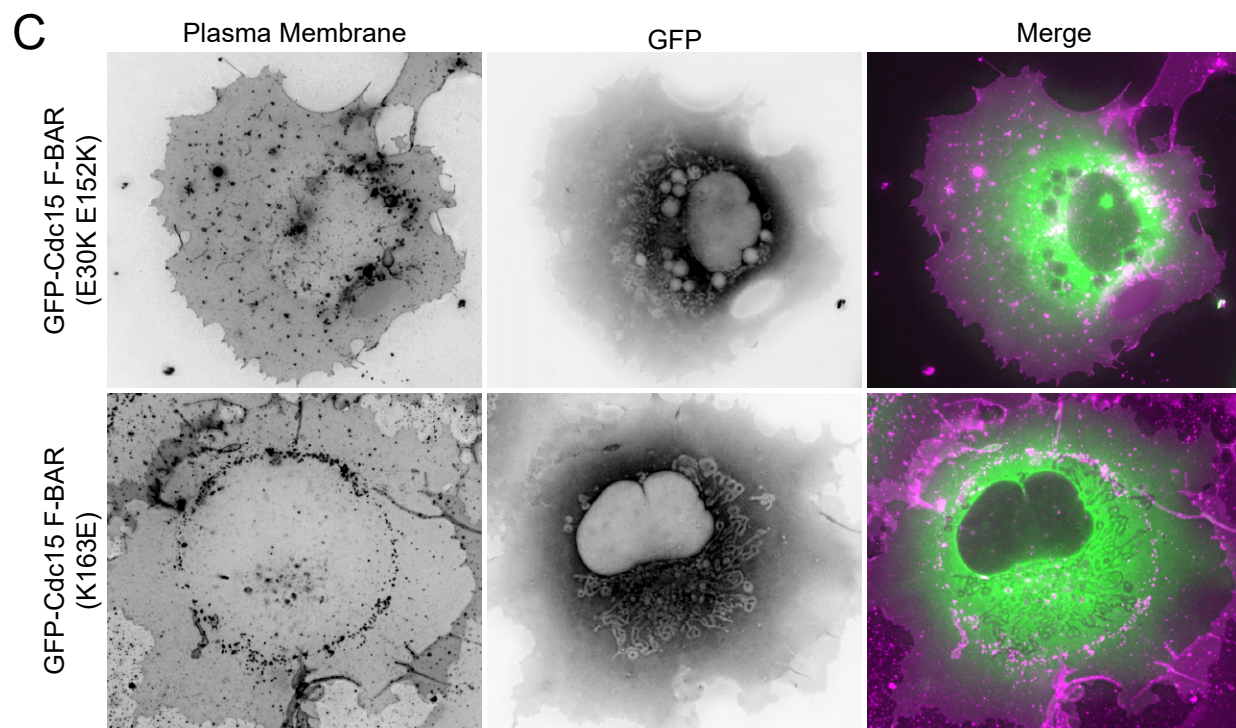

**Figure S5, related to Figure 5. F-BAR domain oligomerization and membrane binding. A)**

Analytical ultracentrifugation traces of additional Cdc15 F-BAR domain mutants. B) Bio-Layer

Interferometry binding assay between additional Cdc15 F-BAR domain mutants at 1  $\mu$ M and

100 nm liposomes composed of 69.9% DOPC / 15% DOPE / 10% DOPS / 5% PI(4)P / 0.1%

Biotin-PE. Error bars indicate SEM. \*\*,  $p < 0.01$ , one-way ANOVA. C) GFP-Cdc15 F-BAR domain

mutants were expressed in COS-7 cells and co-stained with CellMask Orange plasma

membrane dye. Scale bar = 10  $\mu$ m.

A

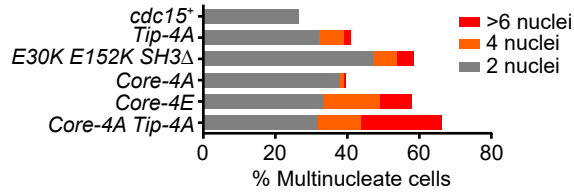

B

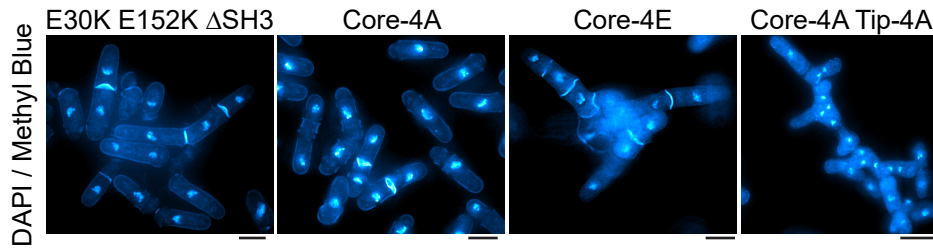

C

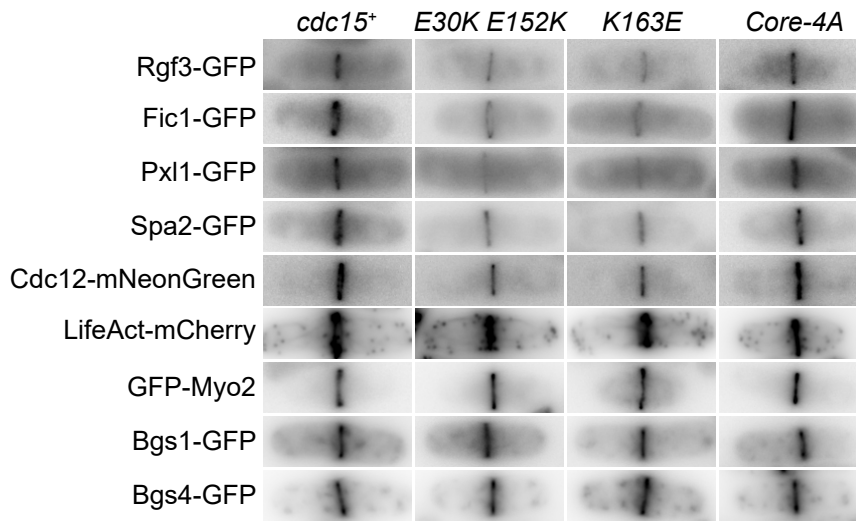

D

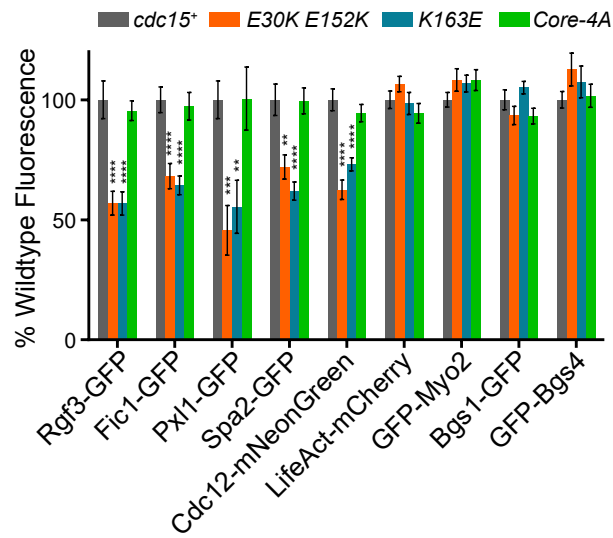

E

| <i>cdc15(E30K E152K)</i> |        |                  |      |
|--------------------------|--------|------------------|------|
| <i>myo2-E1</i>           | lethal | <i>cdc12-112</i> | sick |
| <i>cdc4-8</i>            | lethal | <i>cps1-191</i>  | sick |
| <i>imp2Δ</i>             | lethal | <i>fic1Δ</i>     | sick |
| <i>rng2-D5</i>           | lethal | <i>mid1Δ</i>     | none |
| <i>pxl1Δ</i>             | lethal | <i>rgf3-s44</i>  | none |
| <i>sid2-250</i>          | lethal | <i>spa2Δ</i>     | none |



**Figure S6, related to Figure 6. Oligomerization is critical for Cdc15 function in**

**cytokinesis.** A) Number of nuclei per cell in the indicated *cdc15* mutants. Wildtype data is from Figure 7B.  $n > 400$  for each genotype. B) DAPI (DNA) and Methyl Blue (cell wall / septum) staining of the indicated *cdc15* mutants. C-D) Representative sum projection images (C) and quantification (D) of contractile ring fluorescence intensity of the indicated fluorescently tagged proteins in *cdc15*<sup>+</sup>, *cdc15(E30K E152K)*, *cdc15(K163E)*, or *cdc15(Core-4A)* strains.  $n > 50$  for each condition. Error bars indicate SEM. \*\*,  $p < 0.01$ ; \*\*\*,  $p < .001$ ; \*\*\*\*,  $p < .0001$ , one-way ANOVA. E) Summary of *cdc15(E30K E152K)* synthetic genetic interactions. See also Figure S7. All scale bars = 4  $\mu\text{m}$ .

**A**

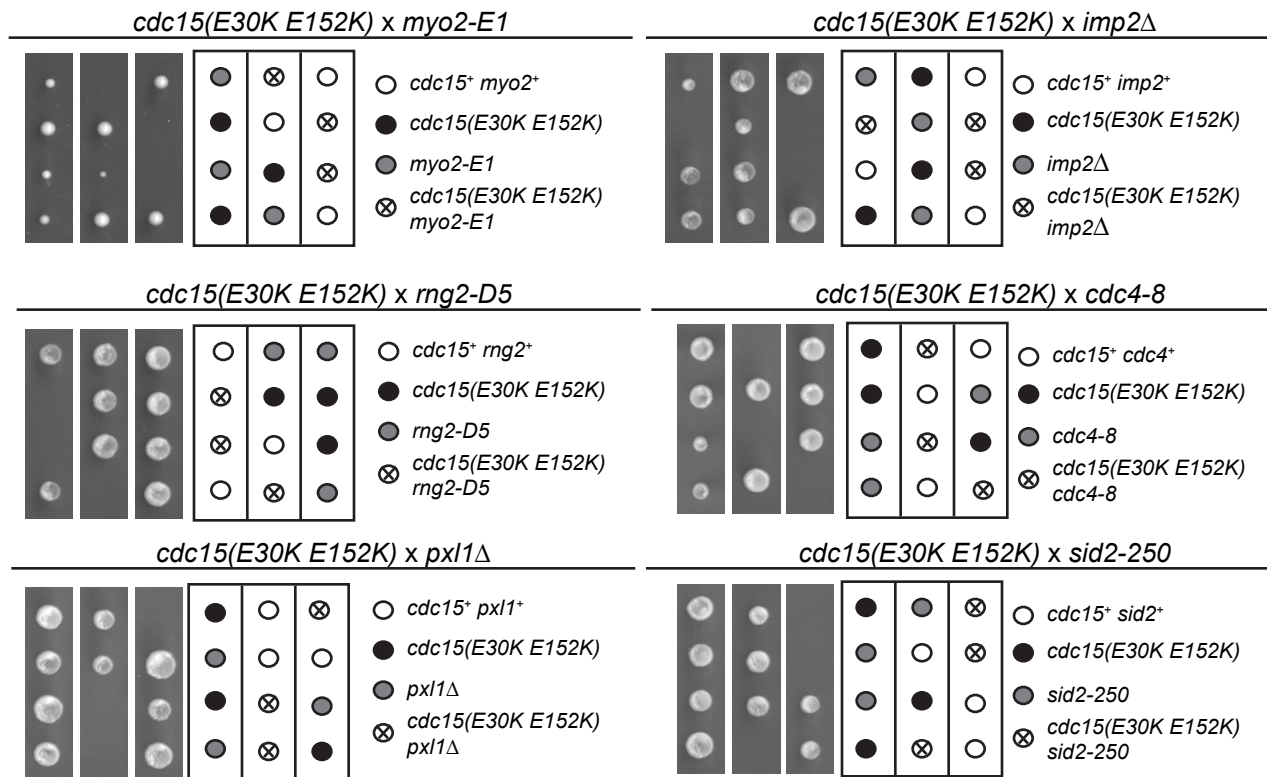

**B**

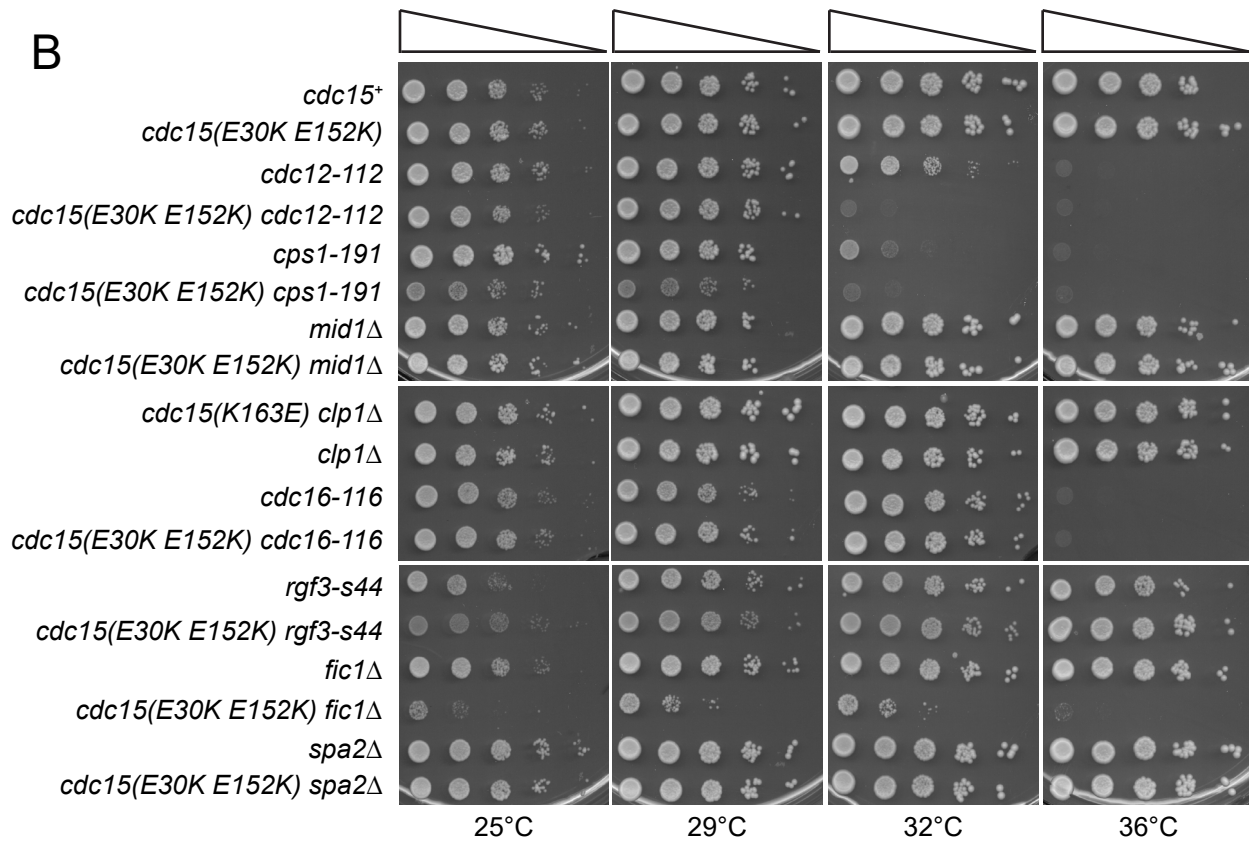

**Figure S7, related to Figure 6. Cdc15 oligomerization mutant genetic interactions. A)**

Representative tetrad dissections from the indicated *cdc15(E30K E152K)* crosses. Relevant

genotypes are indicated. B) Serial dilutions of indicated strains grown at different temperatures.

**Table S1, related to Figure 3.** Membrane tubulation by human F-BAR domains.

| <b>Gene</b> | <b>Protein</b>                                                    | <b>Tubulation (+/-/none)*</b> | <b>First reported (in vivo, in vitro)</b>                         |
|-------------|-------------------------------------------------------------------|-------------------------------|-------------------------------------------------------------------|
| CIP4        | Cdc42-interacting protein 4                                       | +                             | in vivo, in vitro (Tsujita et al., 2006)                          |
| FBP17       | Formin-binding protein 17                                         | +                             | in vivo (Kamioka et al., 2004)<br>in vitro (Tsujita et al., 2006) |
| FCHO1       | FCH domain only protein 1                                         | +                             | in vivo, in vitro (Henne et al., 2010)                            |
| FCHO2       | FCH domain only protein 2                                         | +                             | in vitro (Henne et al., 2007)<br>in vivo (Henne et al., 2010)     |
| FCHSD1      | FCH and double SH3 domain protein 1                               | none                          | in vivo, in vitro (this study)                                    |
| FCHSD2      | FCH and double SH3 domain protein 2                               | none                          | in vivo, in vitro (this study)                                    |
| FER         | Tyrosine protein kinase                                           | none                          | in vivo (Tsujita et al., 2006)<br>in vitro (this study)           |
| FES         | Tyrosine protein kinase                                           | none                          | in vivo, in vitro (this study)                                    |
| GAS7        | Growth arrest specific protein 7                                  | none                          | in vivo, in vitro (this study)                                    |
| NOSTRIN     | Nitric oxide synthase trafficking                                 | +                             | in vivo, in vitro (this study)                                    |
| PACSIN1     | Protein kinase C and casein kinase substrate in neurons protein 1 | +                             | in vitro (Wang et al., 2009)                                      |
| PACSIN2     | Protein kinase C and casein kinase substrate in neurons protein 2 | +                             | in vivo (Shimada et al., 2010)<br>in vitro (Bai et al., 2012)     |
| PACSIN3     | Protein kinase C and casein kinase substrate in neurons protein 3 | +                             | in vitro (Bai et al., 2012)                                       |
| PSTPIP1     | Proline-serine-threonine phosphatase interacting protein 1        | +                             | in vivo, in vitro (Tsujita et al., 2006)                          |
| PSTPIP2     | Proline-serine-threonine phosphatase interacting protein 2        | +                             | in vivo (Tsujita et al., 2006)                                    |
| RHOGAP4     | Rho GTPase activating protein 4                                   | none                          | in vivo, in vitro (this study)                                    |
| SRGAP1      | SLIT-ROBO Rho GTPase-activating protein 1                         | -                             | in vivo (Coutinho-Budd et al., 2012)                              |
| SRGAP2A/B/C | SLIT-ROBO Rho GTPase-activating protein 2A/B/C                    | -                             | in vivo, in vitro (Guerrier et al., 2009)                         |
| SRGAP3      | SLIT-ROBO Rho GTPase-activating protein 3                         | -                             | in vivo (Carlson et al., 2011)                                    |
| TOCA1       | Transducer of Cdc42-dependent actin assembly                      | +                             | in vivo (Kakimoto et al., 2006)<br>in vitro (Wang et al., 2009)   |

\*+, positive membrane curvature; -, negative membrane curvature.



**Movie S1, related to Figure 6.** Time-lapse of *cdc15(E30K E152K)-mCherry sid4-GFP* cells failing cytokinesis. Time overlay indicates minutes from spindle pole body separation.

**Movie S2, related to Figure 6.** Time-lapse of *cdc15(K163E)-mCherry sid4-GFP* cells failing cytokinesis. Time overlay indicates minutes from spindle pole body separation.

## Supplemental Experimental Procedures

### *Yeast Strains, Media, and Genetics*

*S. pombe* strains (see “*S. pombe* strains used in this study” below) were grown in yeast extract (YE) media or 4X YE for large scale purifications. *cdc15* mutants were integrated at the endogenous locus by rescuing *cdc15<sup>+</sup>/cdc15::ura4<sup>+</sup>* diploids with *pIRT2-cdc15* mutant constructs containing 5' and 3' noncoding flanks. Haploid integrants resistant to 5-fluorouracil acid (5-FOA) were isolated and the *cdc15* mutations were verified by PCR and sequencing. *cdc15* diploids for tetrad dissection assays were created by integrating constructs containing 5' and 3' noncoding flanks and a *kan<sup>R</sup>* marker 3' to the *cdc15* gene in a *cdc15<sup>+</sup>/cdc15::ura4<sup>+</sup>* diploid strain. Integrants resistant to 5-FOA and G418 were selected and verified before sporulation and tetrad dissection. *cdc15* and *cdc15* mutants were tagged endogenously at their 3' termini with *kan<sup>R</sup>*, *hygr<sup>R</sup>*, *mCherry-kan<sup>R</sup>*, *EGFP-kan<sup>R</sup>*, or *TEV-2xProtA-kan<sup>R</sup>* (Bähler et al., 1998). Transformations of *S. pombe* cells were performed with a lithium acetate method (Keeney and Boeke, 1994). Standard methods were used for genetic crosses and tetrad analyses.

### *Cell Culture*

COS-7 cells were grown in DMEM media + 10% FBS (Life Technologies). COS-7 cells were plated for transfection and microscopy on glass slides or MatTek glass bottom dishes (MatTek Corporation, Ashland, MA) coated with fibronectin (Sigma-Aldrich). When assaying tubulation (Figures 2, S2, and S3) pEGFP F-BAR constructs were transfected into COS-7 cells with Lipofectamine 3000 reagents according to manufacturer's protocols for 24 hours (Life Technologies), co-stained with CellMask Orange plasma membrane dye for 5 minutes at 37°C (Life Technologies), and immediately imaged. pEGFP Fer constructs (Figure 7) were also transfected with Lipofectamine 3000 reagents, but COS-7 cells were fixed after 24 hours with 4% paraformaldehyde, permeabilized with 0.2% NP-40, and co-stained with Rhodamine-

phalloidin before imaging (Cytoskeleton, Denver, CO) (Itoh et al., 2009). A COS-7 wound healing assay was performed as previously described for RhoGAP4 (Vogt et al., 2007). ~80-90% confluent COS-7 cells were transfected with pEGFP RhoGAP4 constructs for 24 hours before a wound was created with a P200 pipet tip. Expression of transfected F-BARs was confirmed by lysing cells in ice-cold RIPA buffer for 30 minutes, SDS-PAGE, and anti-GFP (Roche) immunoblotting.

### *Molecular Biology*

Cdc15 constructs were created by amplifying Cdc15 fragments (19-312) by PCR from pKLG4456 and subsequent cloning into pREP81 for regulated expression in *S. pombe*, pIRT2 for integration at the endogenous locus (Roberts-Galbraith et al., 2009), pET15b for expression in bacteria, or pEGFP-C1 for expression in COS-7 cells. Human F-BAR constructs were made by amplifying F-BAR sequences from Mammalian Gene Collection clones (GE Dharmacon) and subsequent cloning into pEGFP-C1 or pET15b. GFP-F-BAR constructs were created by subcloning GFP with an 11 residue C-terminal linker (-GGGGSGGGGSG-) into NdeI sites in pET15b F-BAR constructs. Cdc15 F-BAR mutations were made in pET15b, pEGFP, and pIRT2 constructs with a QuikChange Site-Directed Mutagenesis kit (Agilent Technologies). All constructs were sequenced for verification.

### *Protein Purification*

F-BARs and GFP-F-BARs were produced in *Escherichia coli* Rosetta2(DE3)pLysS cells grown in TB by inducing expression in log phase with 0.4 mM IPTG overnight at 18°C. His-tagged proteins were purified on cOmplete His-Tag resin (Roche) in 50mM Tris pH 8.0, 300mM NaCl, 5 mM  $\beta$ -mercaptoethanol. His tags were removed by thrombin digestion (recothrom at 1:100) for 2 hours at room temperature and F-BARs were further purified on a HiTrap Q SP anion exchange column (GE Healthcare) or a HiPrep Sephacryl S-100HR gel filtration column (GE Healthcare)

before being concentrated to ~1-5 mg/mL with Amicon Ultra Centrifugal Filters (Millipore). Full length Cdc15-TEV-2xProtA was purified from *S. pombe* pellets (from 2L of 4X YE) on IgG Sepharose fast flow 6 resin (GE Healthcare) in NP-40 buffer with protease inhibitors (10 mM sodium phosphate pH 8.0, 150 mM NaCl, 1% NP-40, 2mM EDTA, 1mM PMSF, 2mM Benzamidine, 5mM DIFP, and protease inhibitor tablets (Roche)), with additional 1 M NaCl NP-40 buffer washes to eliminate co-purification of binding partners. Full length proteins were cleaved off IgG beads with TEV protease for 2 hours at 16°C and concentrated with Amicon Ultra Centrifugal Filters (Millipore). Cleavage samples were blotted with an  $\alpha$ Cdc15 polyclonal antibody (Roberts-Galbraith et al., 2009).

### *Liposome Binding*

All lipids were obtained from Avanti Polar Lipids. Liposomes were formed as previously described (Itoh et al., 2005). Briefly, CHCl<sub>3</sub> lipid stocks were mixed at the desired ratios and evaporated in a glass tube under N<sub>2</sub> stream, vacuum dried for 1 hour, rehydrated in 20 mM HEPES pH 7.4, 150 mM NaCl buffer before vortexing, 10 cycles of freeze-thawing, and extrusion to various sizes with an Avanti mini-extruder. Liposome co-pelleting assays were performed as previously described (Itoh et al., 2005), where 100  $\mu$ L of 1 mg/mL liposomes were mixed with 100  $\mu$ L of Cdc15 F-BAR (10-20  $\mu$ g total) for 15 min at room temperature before centrifugation at 150,000 xg in an Optima TL ultracentrifuge for 15 min at 25°C. Supernatant and pellet fractions were separated and run on SDS-PAGE. Giant Unilamellar Vesicles (GUVs) were formed by drying 10  $\mu$ L of 10 mg/mL CHCl<sub>3</sub> lipids (69% DOPC, 15% DOPE, 10% DOPS, 5% PI(4)P, 1% Rhodamine-PE) on Indium-Tin-Oxide-coated (ITO) glass coverslips (Sigma-Aldrich) under N<sub>2</sub> stream followed by vacuum for 1 hour. A 2 mm chamber was assembled between the coverslips and filled with a 20 mM HEPES pH 7.4 and 500 mM sucrose buffer through which a 10 Hz, 2.5 V sinusoidal current was passed for 2 hours. After formation, NaCl was added to 150 mM final concentration. For hypo- and hyper-tonic buffer condition



experiments, equal volumes of 20 mM HEPES pH 7.4, 150 mM NaCl or 20 mM HEPES pH 7.4, 150 mM NaCl +100 mM sucrose, respectively, was added to the GUVs before F-BAR addition. Recombinant GFP-F-BAR domain solutions were mixed with GUVs at a final concentration of 10  $\mu$ M (unless otherwise indicated) before imaging in a 0.5 mm chamber. Liposome binding experiments were performed through Bio-Layer Interferometry on an Octet RED96 instrument (ForteBio, Menlo Park, CA) using streptavidin sensor tips (Abdiche et al., 2008). A standard association experiment was performed: streptavidin tips were equilibrated in buffer (20 mM HEPES pH 7.4, 200 mM NaCl) for 120s, blocked with 10 mg/mL BSA for 180s, 100 nm liposomes (containing 0.1% Biotin-PE and the various compositions indicated in the text) were bound for 300s, tips were washed 2x for 180s, and 1  $\mu$ M F-BAR association to equilibrium was monitored for 300s. Raw data was normalized for unequal liposome loading and nonspecific binding was subtracted from a control sensor tip without liposomes; equilibrium binding levels were calculated across at least 3 experiments. One-way ANOVA tests were used to determine significance values between binding conditions and mutants.

### *Microscopy*

*S. pombe* cells were imaged live at 25°C or fixed with ice-cold 70% ethanol and stained with Methyl Blue and DAPI before imaging. GUV, *S. pombe*, and COS-7 cell imaging was performed on a Personal DeltaVision microscope system (Applied Precision) that includes an Olympus IX71 microscope, a 60X NA 1.42 planApo objective, and a Photometrics Coolsnap HQ2 camera. Time-lapse imaging was performed on log-phase cells using an ONIX microfluidics perfusion system, flowing YE media at 25°C through the chamber at 5 psi throughout imaging. Image stacks were deconvolved using softWoRx imaging software. Cdc15 FRAP experiments were performed on a Zeiss LSM510 META microscope system with a 63X plan-Apochromat objective. COS-7 cell FRAP experiments were performed on a spinning disk system which includes a Zeiss Axiovert200m microscope, Yokogawa CSU-22, 63X NA 1.46 planApochromat

objective, Hamamatsu ImageEM-X2 camera, and an Andor Micropoint bleaching system. COS-7 wound healing images were acquired on an EVOS FL imaging system (ThermoFisher) with a 10X objective. Image projections, intensity measurements, and FRAP analyses were performed with ImageJ software (<http://rsweb.nih.gov/ij/>). Lamellipodia were considered arc-shaped membrane edges with decreasing actin staining intensity with increasing distance toward the cell middle (Itoh et al., 2009). Quantification of COS-7 wound healing was performed by measuring the advancement of the leading cell edge into the wound after 8 hours as a percentage of the original wound area. One-way ANOVA tests were used to determine significance values between conditions.

#### *Electron Microscopy*

5  $\mu$ L of 1  $\mu$ g/mL Cdc15 F-BAR solution diluted into 50 mM NaCl, 20 mM Tris-HCl pH 7.4 for oligomer visualization alone (Figure 4C), or 5  $\mu$ L of 1:1 1mg/mL liposomes (composed of 70% DOPC / 15% DOPE / 10% DOPS / 5% PI(4)P):10 $\mu$ M final concentration F-BARs in 150mM NaCl, 20 mM Tris-HCl pH 7.4 for liposome bound samples (Figures 2B and 3B), was adsorbed to a glow discharged 200-mesh copper grid covered with carbon-coated collodion film (EMS, Hatfield, PA). For oligomer bound samples in Figure S4, 1 mg/mL Cdc15 F-BAR was mixed with 1 mg/mL liposomes at 200 mM NaCl to allow membrane binding. This sample was diluted to 100 mM NaCl to induce oligomerization before 5  $\mu$ L was added to an EM grid. Grids were washed in two drops of water to remove unbound sample and stained with two drops of 0.75% uranyl formate (Ohi et al., 2004). Samples were imaged on a FEI Morgagni electron microscope operated at 100 kV and images were captured at 18,000-36,000X on a 1K x 1K CCD camera (ATM, Woburn, MA).

#### *Analytical Ultracentrifugation*

F-BAR domains were diluted to a final concentration of 0.5 mg/mL and 50 mM NaCl to induce oligomerization before ultracentrifugation. Sedimentation experiments were run at 42,000 rpm at 4°C on an Optima XLI ultracentrifuge (Beckman-Coulter) with a four-hole An60Ti rotor. 1.2 cm path-length centerpieces with sapphire windows were used to collect 280 and 230 nm scan data. Velocity scans were analyzed with SedFit (version 14.81) using 250 scans collected ~2 min apart (Schuck, 2000). Size distributions were determined for a confidence level of  $p = 0.95$  and resolution of  $n = 200$ .

### *Circular dichroism*

Circular dichroism measurements were performed on a Jasco J-810 spectropolarimeter between 330-250nm. Scans were acquired at 20nm/min with 4 sec response times, a 1 nm bandwidth, and 4 accumulations. Ellipticity measurements were converted to molar ellipticity for presentation  $[\theta]$  ( $\text{cm}^2\text{dmol}^{-1}$ ).

### *Structural Modelling*

The Cdc15 F-BAR domain structural model was generated using the Protein Homology/analogy Recognition Engine V 2.0 (Phyre<sup>2</sup>) (Kelley and Sternberg, 2009) with the Hof1 F-BAR as a template structure (PDB 4WPE) using the one-to-one threading mode. Fer and RhoGAP4 F-BAR domain models were generated in the standard mode, which identified Fes (PDB: 4DYL) and CIP4 (PDB: 2EFK) F-BAR structures as homologous templates, respectively. Negatively charged surface patches along the sides of the Fer and RhoGAP4 F-BAR models were identified with the use of surface electrostatic potential maps. Mutations tested for inhibition of oligomerization included: Fer – 1) E90K, D91K, E239K 2) E124K, E132K 3) E265K and 4) E276K, E278K, D280K; RhoGAP4 – 1) E122K 2) E155K, E156K, E159K 3) E182K, E187K, E192K 4) D304K, D307K. Graphical representations of the F-BAR model were generated using PyMOL (Schrodinger, LLC).

*S. pombe* strains used in this study

| Strain           | Genotype                                                                                                                             | Source                           |
|------------------|--------------------------------------------------------------------------------------------------------------------------------------|----------------------------------|
| <b>Figure 1</b>  |                                                                                                                                      |                                  |
| KLG18191         | <i>cdc15<sup>+</sup> / cdc15 F-BAR(1-319):Kan<sup>R</sup> ade6-m210 / ade6-m216 leu1-32 / leu1-32 ura4-D18 / ura4-D18 diploid</i>    | this study                       |
| KLG18192         | <i>cdc15<sup>+</sup> / cdc15(327-927):Kan<sup>R</sup> ade6-m210 / ade6-m216 leu1-32 / leu1-32 ura4-D18 / ura4-D18 diploid</i>        | this study                       |
| <b>Figure 5</b>  |                                                                                                                                      |                                  |
| KLG7476          | <i>cdc15-TEV-2xProtA:Kan<sup>R</sup> ade6-M21X leu1-32 ura4-D18 h<sup>-</sup></i>                                                    | (Roberts-Galbraith et al., 2010) |
| KLG17817         | <i>cdc15(E30K E152K)-TEV-2xProtA:Kan<sup>R</sup> ade6-M21X leu1-32 ura4-D18 h<sup>-</sup></i>                                        | this study                       |
| KLG16373         | <i>cdc15(K163E)-TEV-2xProtA:Kan<sup>R</sup> ade6-M21X leu1-32 ura4-D18 h<sup>-</sup></i>                                             | this study                       |
| <b>Figure 6</b>  |                                                                                                                                      |                                  |
| KLG17863         | <i>cdc15<sup>+</sup> / cdc15(Core-4E K163E):Kan<sup>R</sup> ade6-M210 / ade6-M216 ura4-D18 / ura4-D18 leu1-32 / leu1-32 diploid</i>  | this study                       |
| KLG7326          | <i>cdc15-mCherry:Kan<sup>R</sup> ade6-M210 leu1-32 ura4-D18 h<sup>-</sup></i>                                                        | lab stock                        |
| KLG17101         | <i>cdc15(E30K E152K)-mCherry:Kan<sup>R</sup> ade6-M21X leu1-32 ura4-D18 h<sup>-</sup></i>                                            | this study                       |
| KLG16187         | <i>cdc15(K163E)-mCherry:Kan<sup>R</sup> ade6-M21X leu1-32 ura4-D18 h<sup>-</sup></i>                                                 | this study                       |
| KLG17748         | <i>cdc15(Core-4A)-mCherry:Kan<sup>R</sup> ade6-M21X leu1-32 ura4-D18 h<sup>-</sup></i>                                               | this study                       |
| KLG3019          | <i>cdc15-GFP:Kan<sup>R</sup> ade6-M210 leu1-32 ura4-D18 h<sup>-</sup></i>                                                            | lab stock                        |
| KLG17100         | <i>cdc15(E30K E152K)-GFP:Kan<sup>R</sup> ade6-M21X leu1-32 ura4-D18 h<sup>-</sup></i>                                                | this study                       |
| KLG17400         | <i>cdc15(K163E)-GFP:Kan<sup>R</sup> ade6-M21X leu1-32 ura4-D18 h<sup>-</sup></i>                                                     | this study                       |
| KLG17747         | <i>cdc15(Core-4A)-GFP:Kan<sup>R</sup> ade6-M21X leu1-32 ura4-D18 h<sup>-</sup></i>                                                   | this study                       |
| KLG246           | <i>ade6-m210 leu1-32 ura4-D18 h<sup>-</sup></i>                                                                                      | lab stock                        |
| KLG17094         | <i>cdc15(E30K E152K) ade6-M21X leu1-32 ura4-D18 h<sup>-</sup></i>                                                                    | this study                       |
| KLG16009         | <i>cdc15(K163E) ade6-M21X leu1-32 ura4-D18 h<sup>-</sup></i>                                                                         | this study                       |
| KLG7450          | <i>rlc1-GFP:ura4<sup>+</sup> sid4-GFP:Kan<sup>R</sup> ade6-M21X leu1-32 ura4-D18 h<sup>-</sup></i>                                   | lab stock                        |
| KLG17104         | <i>cdc15(E30K E152K):Kan<sup>R</sup> rlc1-GFP:ura4<sup>+</sup> sid4-GFP:Kan<sup>R</sup> ade6-M21X leu1-32 ura4-D18 h<sup>-</sup></i> | this study                       |
| KLG17409         | <i>cdc15(K163E):Kan<sup>R</sup> rlc1-GFP:ura4<sup>+</sup> sid4-GFP:Kan<sup>R</sup> ade6-M21X leu1-32 ura4-D18 h<sup>-</sup></i>      | this study                       |
| KLG17891         | <i>cdc15(E30K E152K)-mCherry:Kan<sup>R</sup> sid4-GFP:Kan<sup>R</sup> ade6-M21X leu1-32 ura4-D18 h<sup>-</sup></i>                   | this study                       |
| <b>Figure S7</b> |                                                                                                                                      |                                  |
| KLG4407          | <i>rgf3-GFP:Kan<sup>R</sup> ade6-M210 leu1-32 ura4-D18 h<sup>-</sup></i>                                                             | lab stock                        |
| KLG6522          | <i>fic1-GFP:Kan<sup>R</sup> ade6-M210 leu1-32 ura4-D18 h<sup>-</sup></i>                                                             | lab stock                        |
| KLG16699         | <i>pxl1-GFP:Kan<sup>R</sup> ade6-M210 leu1-32 ura4-D18 h<sup>+</sup></i>                                                             | lab stock                        |
| KLG7420          | <i>spa2-GFP:Kan<sup>R</sup> ade6-M210 leu1-32 ura4-D18 h<sup>+</sup></i>                                                             | lab stock                        |
| KLG16752         | <i>cdc12-mNeonGreen:Kan<sup>R</sup> ade6-M21X leu1-32 ura4-D18 h<sup>-</sup></i>                                                     | (Willet et al., 2015)            |
| KLG14569         | <i>pAct1-LifeAct-mCherry::leu1<sup>+</sup> ade6-M216 leu1-32 ura4-D18 h<sup>-</sup></i>                                              | (Huang et al., 2012)             |
| KLG5298          | <i>GFP-myo2:Kan<sup>R</sup> ade6-M210 leu1-32 ura4-D18 h<sup>+</sup></i>                                                             | (Wu and Pollard, 2005)           |

|          |                                                                                                                        |                          |
|----------|------------------------------------------------------------------------------------------------------------------------|--------------------------|
| KLG3512  | <i>bgs1-GFP:KanR leu1-32 ura4-D18 h<sup>-</sup></i>                                                                    | Mohan<br>Balasubramanian |
| KLG11110 | <i>GFP-bgs4::leu1<sup>+</sup> bgs4::ura4<sup>+</sup> leu1-32 ura4-D18 his3D-1</i>                                      | (Cortés et al.,<br>2005) |
| KLG17851 | <i>cdc15(E30K E152K) fic1-GFP:Kan<sup>R</sup> ade6-M21X leu1-32 ura4-D18 h<sup>-</sup></i>                             | this study               |
| KLG17853 | <i>cdc15(E30K E152K) pxl1-GFP:Kan<sup>R</sup> ade6-M21X leu1-32 ura4-D18 h<sup>-</sup></i>                             | this study               |
| KLG17854 | <i>cdc15(E30K E152K) spa2-GFP:Kan<sup>R</sup> ade6-M21X leu1-32 ura4-D18 h<sup>-</sup></i>                             | this study               |
| KLG17855 | <i>cdc15(E30K E152K) cdc12-mNeonGreen:Kan<sup>R</sup> ade6-M21X leu1-32 ura4-D18 h<sup>-</sup></i>                     | this study               |
| KLG17856 | <i>cdc15(E30K E152K) pAct1-LifeAct-mCherry::leu1<sup>+</sup> ade6-M21X leu1-32 ura4-D18 h<sup>-</sup></i>              | this study               |
| KLG17857 | <i>cdc15(E30K E152K) GFP-myo2:kan<sup>R</sup> ade6-M21X leu1-32 ura4-D18 h<sup>-</sup></i>                             | this study               |
| KLG17862 | <i>cdc15(E30K E152K) bgs1-GFP:kan<sup>R</sup> ade6-M21X leu1-32 ura4-D18 h<sup>-</sup></i>                             | this study               |
| KLG17858 | <i>cdc15(E30K E152K) GFP-bgs4::leu1<sup>+</sup> ade6-M21X leu1-32 ura4-D18 h<sup>-</sup></i>                           | this study               |
| KLG16618 | <i>cdc15(K163E):Kan<sup>R</sup> ade6-M21X leu1-32 ura4-D18 h<sup>-</sup></i>                                           | this study               |
| KLG17397 | <i>cdc15(K163E):Kan<sup>R</sup> rgf3-GFP:Kan<sup>R</sup> ade6-M21X leu1-32 ura4-D18 h<sup>-</sup></i>                  | this study               |
| KLG17398 | <i>cdc15(K163E):Kan<sup>R</sup> fic1-GFP:Kan<sup>R</sup> ade6-M21X leu1-32 ura4-D18 h<sup>-</sup></i>                  | this study               |
| KLG17396 | <i>cdc15(K163E):Kan<sup>R</sup> pxl1-GFP:Kan<sup>R</sup> ade6-M21X leu1-32 ura4-D18 h<sup>-</sup></i>                  | this study               |
| KLG17399 | <i>cdc15(K163E):Kan<sup>R</sup> spa2-GFP:Kan<sup>R</sup> ade6-M21X leu1-32 ura4-D18 h<sup>-</sup></i>                  | this study               |
| KLG17507 | <i>cdc15(K163E):Kan<sup>R</sup> cdc12-mNeonGreen:Hyg<sup>R</sup> ade6-M21X leu1-32 ura4-D18 h<sup>-</sup></i>          | this study               |
| KLG17516 | <i>cdc15(K163E):Kan<sup>R</sup> pAct1-LifeAct-mCherry::leu1<sup>+</sup> ade6-M216 leu1-32 ura4-D18 h<sup>-</sup></i>   | this study               |
| KLG17515 | <i>cdc15(K163E):Kan<sup>R</sup> GFP-myo2:Kan<sup>R</sup> ade6-M21X leu1-32 ura4-D18 h<sup>-</sup></i>                  | this study               |
| KLG17534 | <i>cdc15(K163E):Kan<sup>R</sup> bgs1-GFP:KanR leu1-32 ura4-D18 h<sup>-</sup></i>                                       | this study               |
| KLG17513 | <i>cdc15(K163E):Kan<sup>R</sup> GFP-bgs4::leu1<sup>+</sup> bgs4::ura4<sup>+</sup> leu1-32 ura4-D18 h<sup>-</sup></i>   | this study               |
| KLG17800 | <i>cdc15(Core-4A):Kan<sup>R</sup> ade6-M21X leu1-32 ura4-D18 h<sup>-</sup></i>                                         | this study               |
| KLG17803 | <i>cdc15(Core-4A):Kan<sup>R</sup> rgf3-GFP:Kan<sup>R</sup> ade6-M21X leu1-32 ura4-D18 h<sup>-</sup></i>                | this study               |
| KLG17804 | <i>cdc15(Core-4A):Kan<sup>R</sup> fic1-GFP:Kan<sup>R</sup> ade6-M21X leu1-32 ura4-D18 h<sup>-</sup></i>                | this study               |
| KLG17801 | <i>cdc15(Core-4A):Kan<sup>R</sup> pxl1-GFP:Kan<sup>R</sup> ade6-M21X leu1-32 ura4-D18 h<sup>-</sup></i>                | this study               |
| KLG17802 | <i>cdc15(Core-4A):Kan<sup>R</sup> spa2-GFP:Kan<sup>R</sup> ade6-M21X leu1-32 ura4-D18 h<sup>-</sup></i>                | this study               |
| KLG17886 | <i>cdc15(Core-4A):Kan<sup>R</sup> cdc12-mNeonGreen:Kan<sup>R</sup> ade6-M21X leu1-32 ura4-D18 h<sup>-</sup></i>        | this study               |
| KLG17806 | <i>cdc15(Core-4A):Kan<sup>R</sup> pAct1-LifeAct-mCherry::leu1<sup>+</sup> ade6-M21X leu1-32 ura4-D18 h<sup>-</sup></i> | this study               |

|                  |                                                                                                           |                                  |
|------------------|-----------------------------------------------------------------------------------------------------------|----------------------------------|
| KLG17849         | <i>cdc15(Core-4A):Kan<sup>R</sup> GFP-myo2:Kan<sup>R</sup> ade6-M21X leu1-32 ura4-D18 h<sup>-</sup></i>   | this study                       |
| KLG17887         | <i>cdc15(Core-4A):Kan<sup>R</sup> Bgs1-GFP:Kan<sup>R</sup> ade6-M21X leu1-32 ura4-D18 h<sup>-</sup></i>   | this study                       |
| KLG17805         | <i>cdc15(Core-4A):Kan<sup>R</sup> GFP-bgs4::leu1<sup>+</sup> ade6-M21X leu1-32 ura4-D18 h<sup>-</sup></i> | this study                       |
| KLG16014         | <i>cdc15(K163A, R177A, R181A, K185A) ade6-M21X leu1-32 ura4-D18 h<sup>-</sup></i>                         |                                  |
| KLG17818         | <i>cdc15(E30K E152K)(1-849):Kan<sup>R</sup> ade6-M21X leu1-32 ura4-D18 h<sup>-</sup></i>                  | this study                       |
| KLG17714         | <i>cdc15(Core-4A) ade6-M21X leu1-32 ura4-D18 h<sup>-</sup></i>                                            | this study                       |
| KLG17782         | <i>cdc15(Core-4E) ade6-M21X leu1-32 ura4-D18 h<sup>-</sup></i>                                            | this study                       |
| KLG17892         | <i>cdc15(Core-4A Tip-4A) ade6-M21X leu1-32 ura4-D18 h<sup>-</sup></i>                                     | this study                       |
| KLG10303         | <i>cdc15(27A) ade6-M21X leu1-32 ura4-D18 h<sup>-</sup></i>                                                | (Roberts-Galbraith et al., 2010) |
| KLG9723          | <i>cdc15(27D) ade6-M21X leu1-32 ura4-D18 h<sup>-</sup></i>                                                | (Roberts-Galbraith et al., 2010) |
| KLG18293         | <i>cdc15(E30K, E152K, 27A) ade6-M21X leu1-32 ura4-D18 h<sup>-</sup></i>                                   | this study                       |
| KLG18294         | <i>cdc15(E30K, E152K, 27D) ade6-M21X leu1-32 ura4-D18 h<sup>-</sup></i>                                   | this study                       |
| <b>Figure S8</b> |                                                                                                           |                                  |
| KLG2971          | <i>myo2-E1 ade6-M216 leu1-32 ura4-D18 h<sup>+</sup></i>                                                   | lab stock                        |
| KLG3354          | <i>imp2::ura4<sup>+</sup> ade6-M210 leu1-32 ura4-D18 h<sup>+</sup></i>                                    | lab stock                        |
| KLG441           | <i>cdc4-8 ade6-M210 ura4-D18 h<sup>+</sup></i>                                                            | lab stock                        |
| KLG6614          | <i>rng2-D5 ade6-M210 leu1-32 ura4-D18 h<sup>+</sup></i>                                                   | lab stock                        |
| KLG7144          | <i>pxl1::ura4<sup>+</sup> ade6-M210 leu1-32 ura4-D18 h<sup>+</sup></i>                                    | lab stock                        |
| KLG11730         | <i>sid2-250 ade6-M210 leu1-32 ura4-D18 h<sup>+</sup></i>                                                  | lab stock                        |
| KLG1002          | <i>cdc12-112 ade6-M212 leu1-32 ura4-D18 h<sup>+</sup></i>                                                 | lab stock                        |
| KLG2153          | <i>cps1-191 ade6-M210 ura4-D18 lys1-131 h<sup>-</sup></i>                                                 | lab stock                        |
| KLG15485         | <i>mid1::ura4<sup>+</sup> ade6-M21X leu1-32 ura4-D18 h<sup>-</sup></i>                                    | lab stock                        |
| KLG3026          | <i>clp1::ura4<sup>+</sup> ade6-M216 leu1-32 ura4-D18 h<sup>+</sup></i>                                    | lab stock                        |
| KLG702           | <i>cdc16-116 ade6-M210 leu1-32 ura4-D18 h<sup>+</sup></i>                                                 | lab stock                        |
| KLG12922         | <i>rgf3-s44 his3-27 leu1-32 ura4-D18 h<sup>-</sup></i>                                                    | lab stock                        |
| KLG6008          | <i>fic1::ura4<sup>+</sup> ade6-M21X leu1-32 ura4-D18 h<sup>+</sup></i>                                    | lab stock                        |
| KLG8152          | <i>spa2::ura4<sup>+</sup> ade6-M210 leu1-32 ura4-D18 h<sup>+</sup></i>                                    | lab stock                        |
| KLG17819         | <i>cdc15(E30K E152K):Hygr<sup>R</sup> ade6-M21X leu1-32 ura4-D18 h<sup>-</sup></i>                        | this study                       |
| KLG17888         | <i>cdc15(E30K E152K):Hygr<sup>R</sup> cdc12-112 ade6-M21X leu1-32 ura4-D18 h<sup>-</sup></i>              | this study                       |
| KLG17893         | <i>cdc15(E30K E152K):Hygr<sup>R</sup> cps1-191 ade6-M21X ura4-D18 lys1-131 h<sup>-</sup></i>              | this study                       |
| KLG17890         | <i>cdc15(E30K E152K):Hygr<sup>R</sup> mid1::ura4<sup>+</sup> ade6-M21X leu1-32 ura4-D18 h<sup>-</sup></i> | this study                       |
| KLG17895         | <i>cdc15(E30K E152K):Hygr<sup>R</sup> clp1::ura4<sup>+</sup> ade6-M21X leu1-32 ura4-D18 h<sup>-</sup></i> | this study                       |
| KLG17896         | <i>cdc15(E30K E152K):Hygr<sup>R</sup> cdc16-116 ade6-M21X leu1-32 ura4-D18 h<sup>-</sup></i>              | this study                       |
| KLG17897         | <i>cdc15(E30K E152K):Hygr<sup>R</sup> rgf3-s44 ade6-M21X leu1-32 ura4-D18 h<sup>-</sup></i>               | this study                       |

|          |                                                                                                           |            |
|----------|-----------------------------------------------------------------------------------------------------------|------------|
| KLG17889 | <i>cdc15(E30K E152K):Hygr<sup>R</sup> fic1::ura4<sup>+</sup> ade6-M21X leu1-32 ura4-D18 h<sup>-</sup></i> | this study |
| KLG17898 | <i>cdc15(E30K E152K):Hygr<sup>R</sup> spa2::ura4<sup>+</sup> ade6-M21X leu1-32 ura4-D18 h<sup>-</sup></i> | this study |

## Supplemental References

- Bähler, J., Wu, J., Longtine, M.S., Shah, N.G., McKenzie III, A., Steever, A.B., Wach, A., Philippsen, P., Pringle, J.R., 1998. Heterologous Modules for Efficient and Versatile PCR-based Gene Targeting in *Schizosaccharomyces pombe*. *Yeast* 14, 943–951.
- Bai, X., Meng, G., Luo, M., Zheng, X., 2012. The rigidity of the wedge loop in PACSIN 3 is a key factor in dictating the diameters of tubules. *J. Biol. Chem.* 287, 22387–22396.
- Carlson, B.R., Lloyd, K.E., Kruszewski, A., Kim, I.-H., Rodriguiz, R.M., Heindel, C., Faytell, M., Dudek, S.M., Wetsel, W.C., Soderling, S.H., 2011. WRP/srGAP3 facilitates the initiation of spine development by an inverse F-BAR domain, and its loss impairs long-term memory. *J. Neurosci.* 31, 2447–60.
- Cortés, J.C.G., Carnero, E., Ishiguro, J., Sánchez, Y., Durán, A., Ribas, J.C., 2005. The novel fission yeast (1,3)beta-D-glucan synthase catalytic subunit Bgs4p is essential during both cytokinesis and polarized growth. *J. Cell Sci.* 118, 157–174.
- Coutinho-Budd, J., Ghukasyan, V., Zylka, M.J., Polleux, F., 2012. The F-BAR domains from srGAP1, srGAP2 and srGAP3 regulate membrane deformation differently. *J. Cell Sci.* 125, 3390–401.
- Guerrier, S., Coutinho-Budd, J., Sassa, T., Gresset, A., Jordan, N.V., Chen, K., Jin, W.-L., Frost, A., Polleux, F., 2009. The F-BAR domain of srGAP2 induces membrane protrusions required for neuronal migration and morphogenesis. *Cell* 138, 990–1004.
- Henne, W., Boucrot, E., Meinecke, M., Evergren, E., Vallis, Y., Mittal, R., McMahon, H.T., 2010. FCHo proteins are nucleators of clathrin-mediated endocytosis. *Science.* 328, 1281–1284.
- Huang, J., Huang, Y., Yu, H., Subramanian, D., Padmanabhan, A., Thadani, R., Tao, Y., Tang, X., Wedlich-Soldner, R., Balasubramanian, M.K., 2012. Nonmedially assembled F-actin cables incorporate into the actomyosin ring in fission yeast. *J. Cell Biol.* 199, 831–847.
- Kakimoto, T., Katoh, H., Negishi, M., 2006. Regulation of neuronal morphology by Toca-1, an F-BAR/EFC protein that induces plasma membrane invagination. *J. Biol. Chem.* 281, 29042–53.
- Keeney, J.B., Boeke, J.D., 1994. Efficient Targeted Integration at *leu1-32* and *ura4-294* in *Schizosaccharomyces pombe*. *Genetics* 136, 849–856.
- Shimada, A., Takano, K., Shirouzu, M., Hanawa-Suetsugu, K., Terada, T., Toyooka, K., Umehara, T., Yamamoto, M., Yokoyama, S., Suetsugu, S., 2010. Mapping of the basic amino-acid residues responsible for tubulation and cellular protrusion by the EFC/F-BAR domain of pacsin2/Syndapin II. *FEBS Lett.* 584, 1111–8.
